# Supplementary material for: High mobility, large linear magnetoresistance, and quantum transport phenomena in Bi2Te3films grown by metallo-organic chemical vapor deposition (MOCVD)
Source: Royal Society of Chemistry journal article supplement (doi:10.1039/c5nr05491e), 2015-01-01
Supplement: c5nr05491e1.pdf [file c5nr05491e1.pdf]

Supporting Information for

**High mobility, large linear magnetoresistance, and quantum transport phenomena in Bi<sub>2</sub>Te<sub>3</sub> films grown by Metallo-Organic Chemical Vapor Deposition (MOCVD)**

Hyunwoo Jin, Kwang-Chon Kim, Juhee Seo, Seong Keun Kim, Byung-ki Cheong, Jin-Sang Kim, and Suyoun Lee\*

\*Corresponding author. E-mail: slee\_eels@kist.re.kr

**This PDF file includes:**

**Figs.S1, S2, S3, S4, and S5**

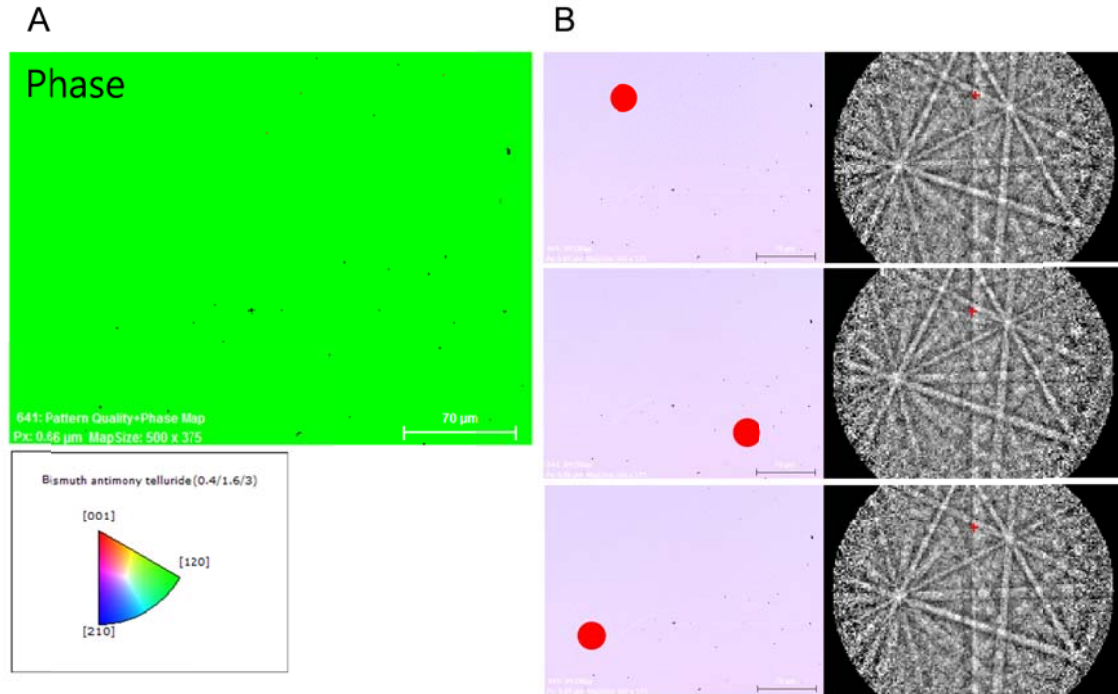

Figure S1. Electron backscattering diffraction analysis of a 200 nm-thick  $\text{Bi}_2\text{Te}_3$  film. (A) Phase map of in-plane crystallographic orientation, (B) Kikuchi patterns at different positions of a  $\text{Bi}_2\text{Te}_3$  film. Scale bar: 70  $\mu\text{m}$ .

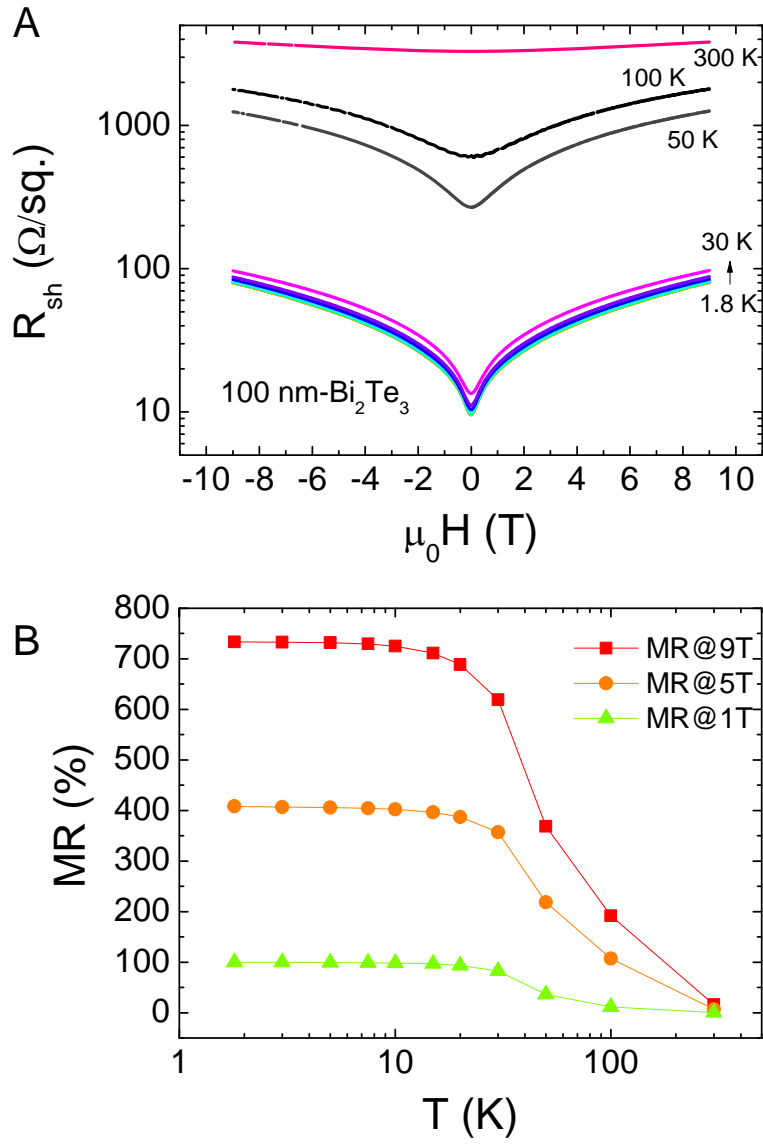

Figure S2. (A) Resistance of a 100 nm-thick  $\text{Bi}_2\text{Te}_3$  film as a function of magnetic field with varying temperature. (B) MR of a 100 nm-thick  $\text{Bi}_2\text{Te}_3$  film at 1, 5, 9 T as a function of temperature.

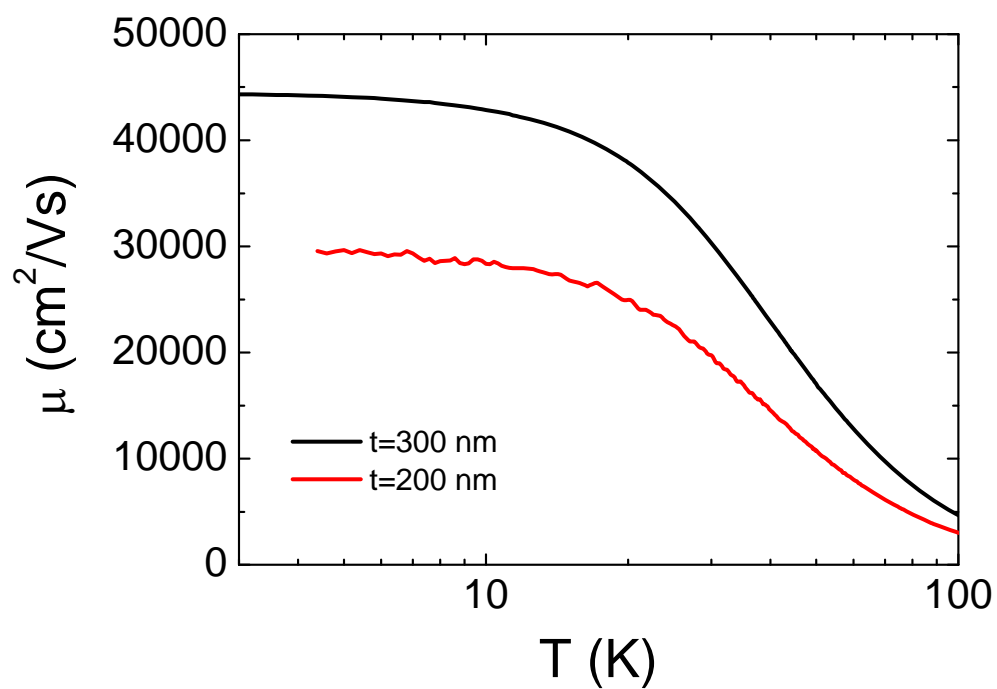

Figure S3. Hall mobility of  $\text{Bi}_2\text{Te}_3$  films with different thickness (black: 300 nm, red: 200 nm) as a function of temperature. The Hall measurement was performed under an external magnetic field ( $B$ ) of  $\pm 2$  T.

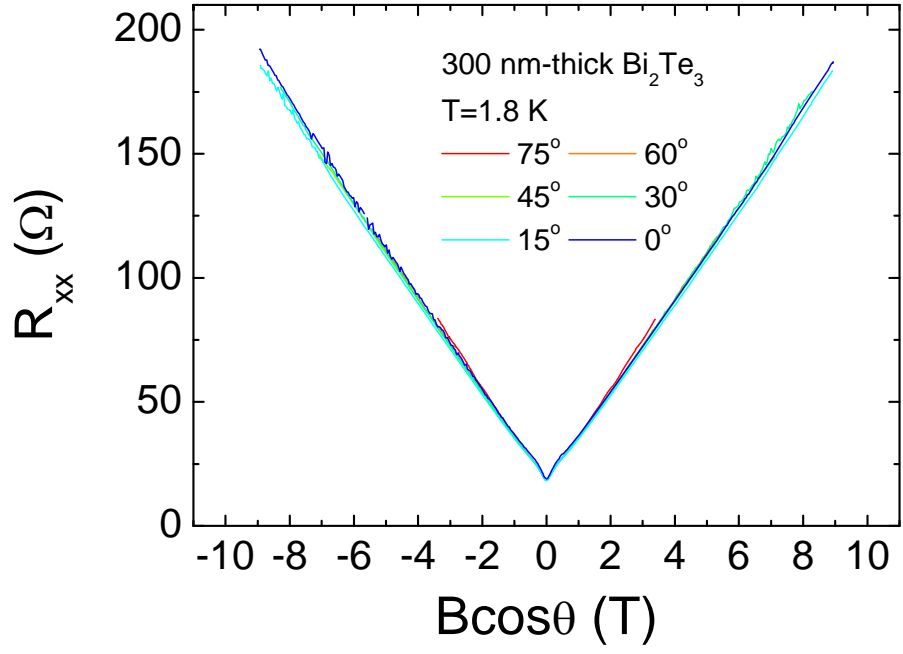

Figure S4. Magnetoresistance of a 300 nm-thick  $\text{Bi}_2\text{Te}_3$  film as a function of the perpendicular component of the magnetic field. The measurement temperature was 1.8 K.

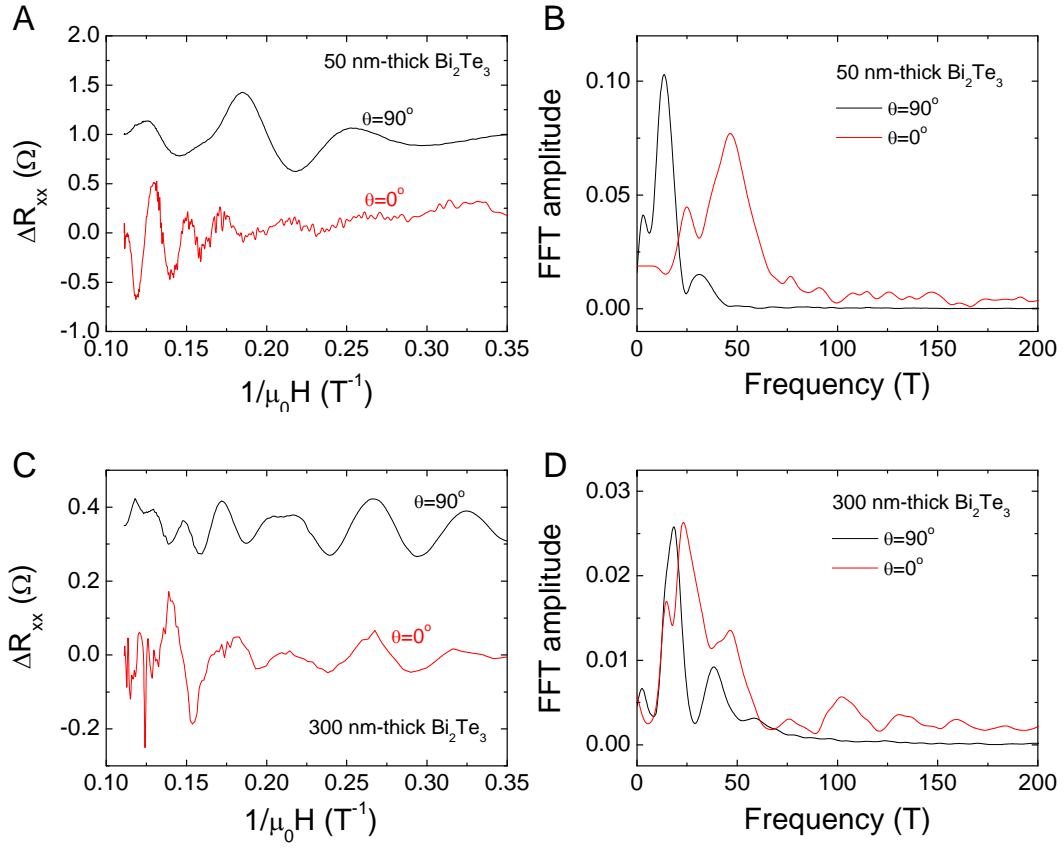

Figure S5. Shubnikov-de Hass oscillation (SdHO) and the Fast Fourier Transform (FFT) of  $\text{Bi}_2\text{Te}_3$  films with different thickness. (A) SdHO of a 50 nm-thick  $\text{Bi}_2\text{Te}_3$  film for  $\theta=0^\circ$  (red) and  $\theta=90^\circ$  (black). (B) FFT of SdHO of a 50 nm-thick  $\text{Bi}_2\text{Te}_3$  film for  $\theta=0^\circ$  (red) and  $\theta=90^\circ$  (black). (C) SdHO of a 300 nm-thick  $\text{Bi}_2\text{Te}_3$  film for  $\theta=0^\circ$  (red) and  $\theta=90^\circ$  (black). (D) FFT of SdHO of a 300 nm-thick  $\text{Bi}_2\text{Te}_3$  film for  $\theta=0^\circ$  (red) and  $90^\circ$  (black).
